# Supplementary material for: Sensitive red protein calcium indicators for imaging neural activity
Source: eLife. 2016 Mar 24;5:e12727. doi: 10.7554/eLife.12727 (PMC4846379; doi:10.7554/eLife.12727)
Supplement: Figure 7—source data 1. — Wilcoxon rank sum test is used for p-value. DOI: http://dx.doi.org/10.7554/eLife.12727.022 [file elife-12727-fig7-data1.xlsx]

## Sheet: Sheet1
	Stim. Freq. (Hz)	R-GECO1	jRGECO1a	jRGECO1b		R-GECO1	jRGECO1a	jRGECO1b		jRGECO1a vs R-GECO1
		Mean				SEM				p-value
DF/F0	1	0.0198482	0.115563	0.0593914		0.00432741	0.00948224	0.00218054		<0.001
	5	0.0437963	0.461824	0.227557		0.00377669	0.0530728	0.0152863		<0.001
	10	0.0569699	1.01487	0.603601		0.00998715	0.118914	0.0410152		<0.001
	20	0.102528	1.80209	1.62531		0.0183471	0.144648	0.14595		<0.001
	40	0.504732	2.47545	2.48576		0.0653776	0.174007	0.121702		<0.001
	80	1.16449	2.54852	2.51578		0.0683289	0.175995	0.0980216		<0.001
	160	1.55223	2.34845	2.24384		0.0689175	0.170988	0.0816294		0.000543718
		Mean				SEM				p-value
Half rise time (s)	1	0.128417	0.132559	0.128417		0.0160971	0	0.00365332		0.656691
	5	0.497097	0.683885	0.629656		0.065025	0.0255637	0.0331398		0.00568919
	10	0.392943	0.819457	0.878205		0.0413266	0.0147592	0.0405878		0
	20	0.489733	0.668821	0.82021		0.0588231	0.022275	0.0269172		0.0358375
	40	0.637021	0.479021	0.621371		0.0295495	0.016998	0.0189329		0.00148865
	80	0.40136	0.316334	0.405963		0.018114	0.00852123	0.00915936		0.00121994
	160	0.254072	0.219928	0.281688		0.00855666	0.0073796	0.0055233		0.0182994
		Mean				SEM				p-value
Half decay time (s)	1	0.223694	0.231979	0.223694		0.0686702	0.0333899	0.0296154		0.697891
	5	0.331398	0.518186	0.41839		0.061703	0.0277486	0.0182666		0.28022
	10	0.209885	0.53325	0.439102		0.0366374	0.0246294	0.0132444		<0.001
	20	0.153272	0.560364	0.497097		0.0156649	0.0188946	0.0135293		<0.001
	40	0.180428	0.542288	0.542664		0.00520742	0.0124217	0.0165123		<0.001
	80	0.176746	0.445881	0.542664		0.00494019	0.0124825	0.012273		<0.001
	160	0.198839	0.418767	0.517809		8.77708e-18	0.015411	0.0134586		<0.001
