# Supplementary material for: Sensitive red protein calcium indicators for imaging neural activity
Source: eLife. 2016 Mar 24;5:e12727. doi: 10.7554/eLife.12727 (PMC4846379; doi:10.7554/eLife.12727)
Supplement: Figure 7—source data 2. — Wilcoxon rank sum test is used for p-value. DOI: http://dx.doi.org/10.7554/eLife.12727.023 [file elife-12727-fig7-data2.xlsx]

## Sheet: Sheet1
	Stim. Freq. (Hz)	RCaMP1h	jRCaMP1a	jRCaMP1b		RCaMP1h	jRCaMP1a	jRCaMP1b		jRCaMP1a vs RCaMP1h	jRCaMP1b vs RCaMP1h
		Mean				SEM				p-value
DF/F0	1	0.0125811	0.0856888	0.0351216		0.00146485	0.00493341	0.002806		<0.001	<0.001
	5	0.0204384	0.296037	0.125282		0.00193123	0.0164853	0.00689095		<0.001	<0.001
	10	0.0411172	0.525509	0.27504		0.00379304	0.0287762	0.0128486		<0.001	<0.001
	20	0.130005	0.844864	0.58732		0.0128582	0.0445223	0.0250787		<0.001	<0.001
	40	0.366667	0.99169	1.01051		0.0332672	0.0513781	0.0327203		<0.001	<0.001
	80	0.67937	0.927857	1.25522		0.0518991	0.0466373	0.0337913		0.00762086	<0.001
	160	0.850878	0.780041	1.25247		0.0570476	0.0369953	0.0415133		0.315378	<0.001
		Mean				SEM				p-value
Half rise time (s)	1	0.169379	0.145813	0.168458		0.0611946	0.00662786	0.00953578		0.0365888	0.0368973
	5	0.533911	0.636275	0.745635		0.147993	0.0239805	0.0274456		0.455715	0.238075
	10	1.10833	0.768832	0.867145		0.0752636	0.0139886	0.0171268		0.00344238	0.0391913
	20	1.25929	0.669414	0.87543		0.0578226	0.015987	0.0121347		<0.001	0.00369111
	40	1.22247	0.444067	0.693164		0.02588	0.0162349	0.0156782		<0.001	<0.001
	80	1.06414	0.298254	0.46395		0.0151819	0.00893701	0.00992762		<0.001	<0.001
	160	0.913172	0.225347	0.317585		0.0140695	0.00599513	0.00588324		<0.001	<0.001
		Mean				SEM				p-value
Half decay time (s)	1	0.397672	0.57331	0.381102		0.107781	0.0525025	0.0723229		0.343697	0.848741
	5	1.73061	2.08115	1.29243		0.156593	0.0550552	0.0581302		0.159605	0.0940181
	10	1.4434	2.07452	1.32005		0.0911061	0.0328974	0.0474384		<0.001	0.422226
	20	1.24825	2.12092	1.27586		0.031244	0	0.0301353		<0.001	0.619844
	40	1.24457	2.08778	1.00246		0.0257224	1.33898e-16	0.0202502		<0.001	<0.001
	80	1.24088	2.05464	0.753919		0.0257224	0	0.0202502		<0.001	<0.001
	160	1.25929	2.03807	0.729065		0.0296407	0.00805571	0.0198552		<0.001	<0.001
