# Supplementary material for: Sensitive red protein calcium indicators for imaging neural activity
Source: eLife. 2016 Mar 24;5:e12727. doi: 10.7554/eLife.12727 (PMC4846379; doi:10.7554/eLife.12727)
Supplement: Figure 7—source data 3. — Wilcoxon rank sum test is used for p-value. DOI: http://dx.doi.org/10.7554/eLife.12727.024 [file elife-12727-fig7-data3.xlsx]

## Sheet: Sheet1
	Stim. Freq. (Hz)	GCaMP6s	GCaMP6f	jRCaMP1a	jRCaMP1b	jRGECO1a		GCaMP6s	GCaMP6f	jRCaMP1a	jRCaMP1b	jRGECO1a		jRCaMP1a vs GCaMP6s	jRCaMP1b vs GCaMP6s	jRGECO1a vs GCaMP6s	jRCaMP1a vs GCaMP6f	jRCaMP1b vs GCaMP6f	jRGECO1a vs GCaMP6f
		Mean						SEM						p-value
DF/F0	1	0.0453904	0.0337106	0.0856888	0.0351216	0.115563		0.00286867	0.00243374	0.00493341	0.002806	0.00948224		<0.001	0.0604982	<0.001	<0.001	0.975451	<0.001
	5	0.289189	0.105174	0.296037	0.125282	0.461824		0.020776	0.0108892	0.0164853	0.00689095	0.0530728		0.751334	<0.001	0.0104391	<0.001	0.148086	<0.001
	10	1.16785	0.383474	0.525509	0.27504	1.01487		0.0731199	0.0476693	0.0287762	0.0128486	0.118914		<0.001	<0.001	0.167905	0.0725493	0.230084	<0.001
	20	4.8598	2.3	0.844864	0.58732	1.80209		0.204047	0.243843	0.0445223	0.0250787	0.144648		<0.001	<0.001	<0.001	<0.001	<0.001	0.100668
	40	12.0567	7.79373	0.99169	1.01051	2.47545		0.338086	0.399025	0.0513781	0.0327203	0.174007		<0.001	<0.001	<0.001	<0.001	<0.001	<0.001
	80	12.8594	10.6158	0.927857	1.25522	2.54852		0.478785	0.340301	0.0466373	0.0337913	0.175995		<0.001	<0.001	<0.001	<0.001	<0.001	<0.001
	160	12.2401	11.4886	0.780041	1.25247	2.34845		0.54157	0.342263	0.0369953	0.0415133	0.170988		<0.001	<0.001	<0.001	<0.001	<0.001	<0.001
		Mean						SEM						p-value
Half rise time (s)	1	0.11448	0.174733	0.145812	0.168457	0.132556		0.00852104	0.0603782	0.00662781	0.00953571	8.01234e-18		0.0116483	<0.001	0.0354484	0.0580532	0.00414364	0.152289
	5	0.915843	0.430808	0.63627	0.745629	0.68387		0.0283413	0.0519189	0.0239803	0.0274454	0.0255631		<0.001	0.00127405	<0.001	0.0113381	0.000595517	0.00475396
	10	1.15685	0.837515	0.768826	0.867139	0.819439		0.0111373	0.0191723	0.0139885	0.0171266	0.0147589		<0.001	<0.001	<0.001	0.0240326	0.462478	0.514099
	20	1.16589	0.939944	0.669409	0.875424	0.668807		0.0121132	0.0117326	0.0159869	0.0121346	0.0222745		<0.001	<0.001	<0.001	<0.001	0.00472446	<0.001
	40	0.858603	0.662781	0.444063	0.693159	0.47901		0.0246289	0.0099918	0.0162348	0.0156781	0.0169976		<0.001	0.000634505	<0.001	<0.001	0.189451	<0.001
	80	0.430808	0.337416	0.298252	0.463947	0.316327		0.00706527	0.00368972	0.00893694	0.00992755	0.00852104		<0.001	0.0319528	<0.001	<0.001	<0.001	0.0548822
	160	0.265113	0.225948	0.225346	0.317583	0.219923		0.00407914	0.00368972	0.00599508	0.0058832	0.00737944		<0.001	<0.001	0.000718565	0.893575	<0.001	0.35591
		Mean						SEM						p-value
Half decay time (s)	1	0.439846	0.412732	0.573306	0.381099	0.231973		0.0605159	0.0929617	0.0525022	0.0723223	0.0333892		0.138815	0.537851	0.0148304	0.479748	0.781445	0.531353
	5	0.85559	0.328378	2.08113	1.29242	0.518174		0.0333438	0.0170421	0.0550548	0.0581298	0.0277479		<0.001	<0.001	<0.001	<0.001	<0.001	0.000996319
	10	0.948982	0.334403	2.07451	1.32004	0.533238		0.0311387	0.0149625	0.0328972	0.047438	0.0246289		<0.001	<0.001	<0.001	<0.001	<0.001	<0.001
	20	1.1448	0.379593	2.1209	1.27585	0.560351		0.037244	0.00944709	1.33898e-16	0.0301351	0.0188942		<0.001	0.0103193	<0.001	<0.001	<0.001	<0.001
	40	1.20807	0.394656	2.08776	1.00246	0.542276		0.0259157	0.00758165	1.33898e-16	0.02025	0.0124214		<0.001	<0.001	<0.001	<0.001	<0.001	<0.001
	80	1.20506	0.385618	2.05462	0.753914	0.445871		0.0200968	0.00843181	0	0.02025	0.0124822		<0.001	<0.001	<0.001	<0.001	<0.001	0.00165358
	160	1.13878	0.433821	2.03805	0.729059	0.418757		0.0142902	0.00952681	0.00805565	0.0198551	0.0154107		<0.001	<0.001	<0.001	<0.001	<0.001	0.36444
